# Supplementary material for: Benzenediacrylates as organic battery electrode materials: Na versus Li
Source: Royal Society of Chemistry journal article supplement (doi:10.1039/c4ra06288d), 2014-01-01
Supplement: c4ra06288d1.pdf [file c4ra06288d1.pdf]

### Supporting information

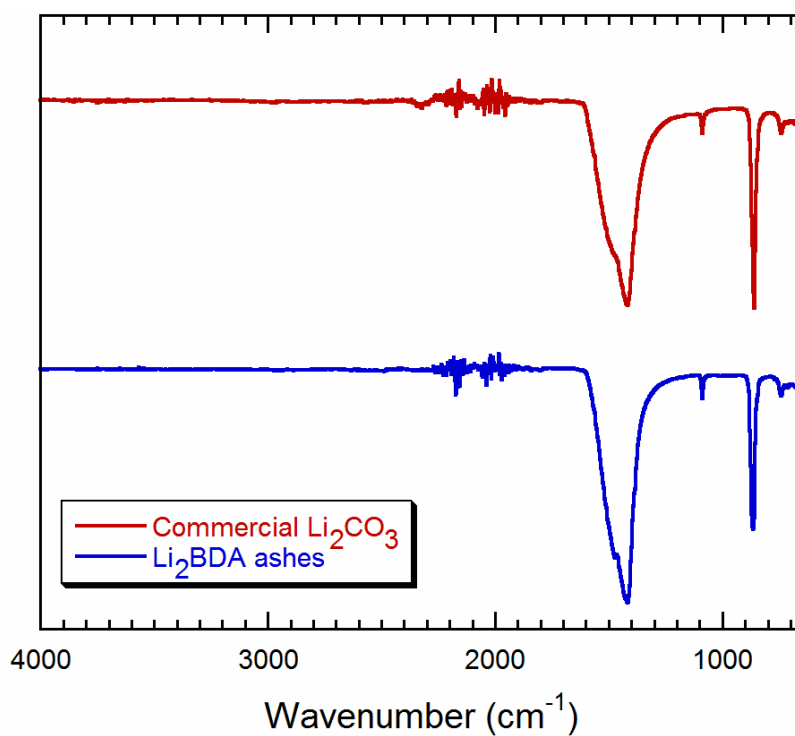

Fig. S1 IR spectra of commercial  $\text{Li}_2\text{CO}_3$  and  $\text{BDALi}_2$  ashes after pyrolysis at 600°C

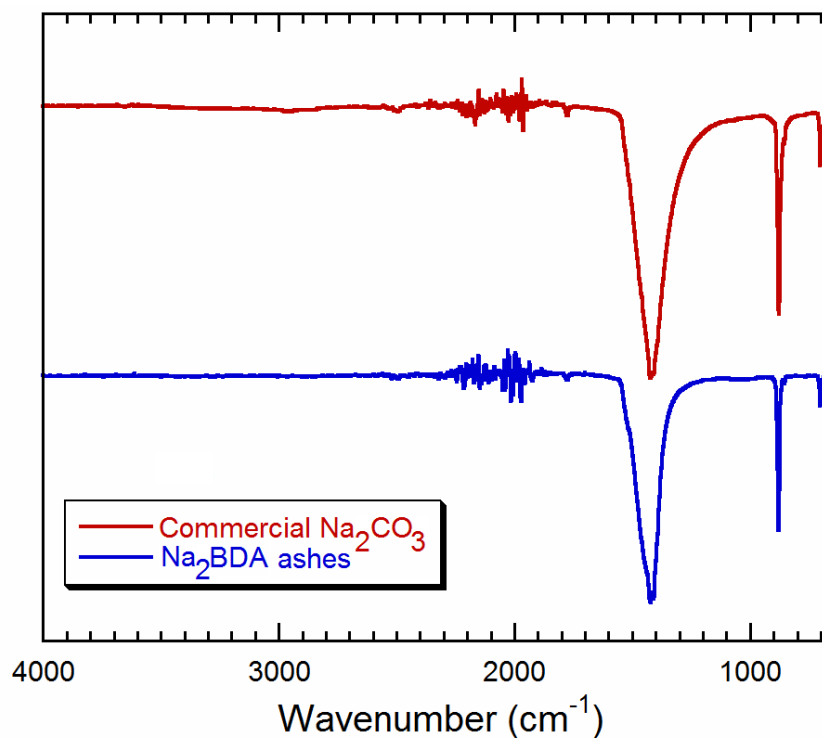

Fig. S2 IR spectra of commercial  $\text{Na}_2\text{CO}_3$  and  $\text{BDANa}_2$  ashes after pyrolysis at 550°C

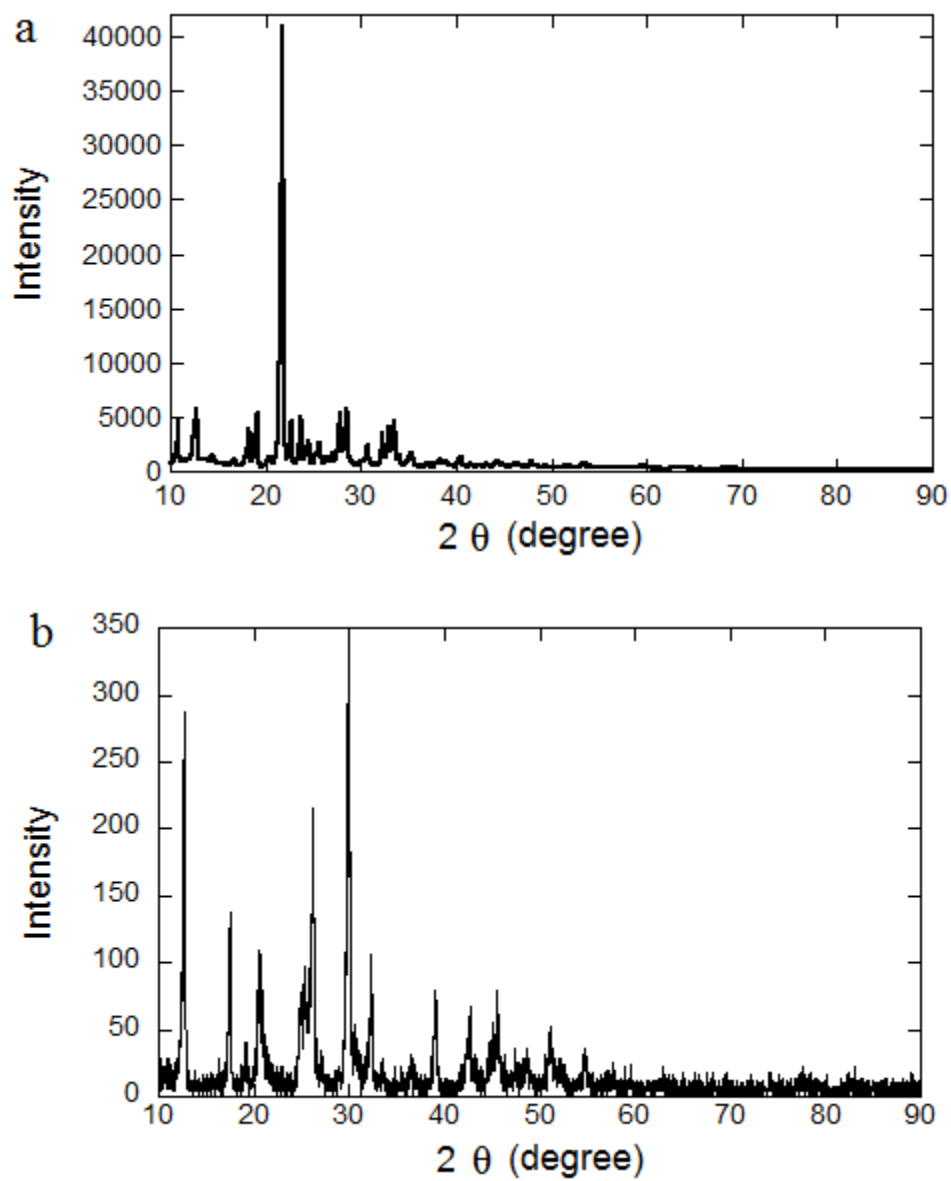

**Fig. S3** XRD patterns of  $\text{Li}_2\text{BDA}$  (a) and  $\text{Na}_2\text{BDA}$  (b)
